# Supplementary material for: Paradoxical Effect of Chloroquine Treatment in Enhancing Chikungunya Virus Infection
Source: MDPI journal article supplement (doi:10.3390/v10050268), 2018-05-17
Supplement: s1 [file s1]

Supplemental Table 1: Demographic characteristic, clinical and biological presentation at inclusion

| INCLUSION                                  | Placebo group         | Chloroquine group     | P-<br>Value  |
|--------------------------------------------|-----------------------|-----------------------|--------------|
| <b>Age</b>                                 |                       |                       |              |
| Mean (SD, min-max)                         | 38.9 (12.5, 18-66)    | 40.3 (12.8, 18-66)    | 0.76         |
| <b>Gender N (%)</b>                        |                       |                       |              |
| Male                                       | 21 (77.8)             | 10 (52.6)             | 0.11         |
| Female                                     | 6 (22.2)              | 9 (47.4)              |              |
| <b>pre-existing orthopaedic illness</b>    | 2 (7.4)               | 0 (0)                 | 0.7          |
| <b>Number of Arthralgia</b>                |                       |                       |              |
| Mean (SD, min-max)                         | 15.6 (10.8, 0-34)     | 16.1 (8.9, 2-30)      |              |
| <b>Intensity of Arthralgia N (%)</b>       |                       |                       |              |
| Absent to moderate                         | 18 (66.7)             | 8 (42.1)              | 0.13         |
| Important                                  | 9 (33.3)              | 11 (57.9)             |              |
| <b>Myalgia N (%)</b>                       |                       |                       |              |
| Absent to moderate                         | 25 (92.6)             | 14 (73.7)             | 0.11         |
| Important                                  | 2 (7.4)               | 5 (26.3)              |              |
| <b>Health status</b>                       |                       |                       |              |
| Mean (SD, min-max)                         | 34.1 (18.3, 2-69)     | 27.6 (23.3, 0-75)     | 0.16         |
| <b>Capacity to perform normal activity</b> |                       |                       |              |
| Mean (SD, min-max)                         | 34.4 (23.4, 0-94)     | 36.5 (27.6, 3-100)    | 0.8          |
| <b>Quality of sleep</b>                    |                       |                       |              |
| Mean (SD, min-max)                         | 27 (28.6, 0-97)       | 35.4 (33.1, 0-95)     | 0.5          |
| <b>Neutrophilia (G/l)</b>                  |                       |                       |              |
| Mean (SD, min-max)                         | 3.1 (1.4, 1.1-6.3)    | 3.7 (1.5, 1.7-7.1)    | 0.2          |
| <b>Lymphocytes (G/l)</b>                   |                       |                       |              |
| Mean (SD, min-max)                         | 0.85 (0.7, 0.4-4)     | 0.78 (0.48, 0.3-1.9)  | 0.61         |
| <b>Platelets (G/l)</b>                     |                       |                       |              |
| Mean (SD, min-max)                         | 168.2 (45.4, 106-294) | 202.4 (67.8, 121-348) | 0.078        |
| <b>C-Reactive Protein (CRP) (mg/l)</b>     |                       |                       |              |
| Mean (SD, min-max)                         | 40.5 (27.3, 9-113)    | 73.5 (56.3, 14-195)   | <b>0.043</b> |
| <b>Viremia log10(copy/ml)</b>              |                       |                       |              |
| Mean (SD, min-max)                         | 8.04 (1.04, 5.6-9.8)  | 8.5 (1.1, 5.6-10.1)   | 0.10         |
| <b>TOTAL</b>                               | <b>27</b>             | <b>19</b>             |              |

**Supplemental Table 2 :** Univariate analysis of cytokines at inclusion (D1), day 3 (D3), day 6 (D6) and day 16 (D16) between placebo and chloroquine groups. Multivariate analysis of the cytokines evolution over time using GEE approach. CQ = chloroquine treatment from CuraChik clinical trial.

| UNIVARIATE ANALYSIS |     |                                 |                                 |                  | GEE analysis         |                  |
|---------------------|-----|---------------------------------|---------------------------------|------------------|----------------------|------------------|
|                     |     | Placebo group                   | Chloroquine group               | p-Value          | Independent Variable | p-Value          |
|                     |     | Mean (SD, min-max)              | Mean (SD, min-max)              |                  |                      |                  |
| <b>Eotaxin</b>      | D1  | 181.7 (85.2 .61-383.7)          | 146.8 (78.5 .37.8-354.8)        | 0.09             | Age                  | 0.66             |
|                     | D3  | 108.7 (38.5 .41-212.4)          | 109.4 (48 .50.5-234.5)          | 0.87             | Sexe                 | <b>0.014</b>     |
|                     | D6  | 87.2 (38.2 .35.4-175.6)         | 108.2 (83.4 .39.9-394.4)        | 0.54             | Viremia D1           | 0.83             |
|                     | D16 | 128.4 (86.2 .13-475.9)          | 114 (72.9 .37.8-326.6)          | 0.34             | CQ                   | <b>0.044</b>     |
| <b>GMCSF</b>        | D1  | 10 (22.6 .0-118.5)              | 4.3 (4.3 .0-17.8)               | 0.22             | Age                  | 0.35             |
|                     | D3  | 5.6 (11.9 .0-59.3)              | 5.2 (6.5 .0-28.2)               | 0.18             | Sexe                 | 0.26             |
|                     | D6  | 8.6 (14.6 .0-50.3)              | 7.2 (12.7 .0-58.4)              | 0.33             | Viremia D1           | 0.39             |
|                     | D16 | 4.1 (6.3 .0-30.6)               | 4.2 (6 .0-27.5)                 | 0.84             | CQ                   | 0.37             |
| <b>IFNa2</b>        | D1  | 68.9 (38 .9.9-171.3)            | 152.5 (139.7 .13.4-534.4)       | <b>0.04</b>      | Age                  | 0.55             |
|                     | D3  | 18.1 (21 .0-84.6)               | 33.9 (19.9 .0-66.2)             | <b>0.004</b>     | Sexe                 | 0.075            |
|                     | D6  | 13.1 (24.6 .0-100.5)            | 7 (8.5 .0-35.2)                 | 0.41             | Viremia D1           | 0.87             |
|                     | D16 | 12.4 (25.8 .0-122.6)            | 4.7 (7.6 .0-30.4)               | 0.70             | CQ                   | 0.50             |
| <b>IL12</b>         | D1  | 22.2 (22.5 .0-96.6)             | 23.4 (34.1 .0-132.6)            | 0.54             | Age                  | 0.15             |
|                     | D3  | 15.3 (7.2 .0-30.7)              | 21 (38.2 .0-129.2)              | 0.07             | Sexe                 | 0.24             |
|                     | D6  | 16.7 (6.1 .8.7-29.4)            | 30.7 (71.5 .0-239.9)            | <b>0.006</b>     | Viremia D1           | 0.25             |
|                     | D16 | 10 (10.2 .0-36.2)               | 19 (47.8 .0-205.5)              | 0.60             | CQ                   | 0.68             |
| <b>IL1RA</b>        | D1  | 250.7 (153.8 .40.3-666.6)       | 375.1 (284.3 .118.1-1141)       | 0.11             | Age                  | 0.89             |
|                     | D3  | 45.1 (62.1 .0-291.3)            | 117.4 (82.1 .9.7-318.6)         | <b>&lt;0.001</b> | Sexe                 | 0.051            |
|                     | D6  | 43.6 (42.8 .0-190.6)            | 89 (83.2 .6-386)                | <b>0.005</b>     | Viremia D1           | 0.35             |
|                     | D16 | 31.5 (47.3 .0-243.3)            | 72.4 (114.6 .0-517.7)           | <b>0.049</b>     | CQ                   | 0.54             |
| <b>IL6</b>          | D1  | 13.7 (14.5 .2.3-66.8)           | 38.7 (39.1 .4.8-158.2)          | <b>0.001</b>     | Age                  | 0.16             |
|                     | D3  | 4.9 (8.1 .0-36)                 | 6.3 (9.5 .0-32.2)               | 0.92             | Sexe                 | 0.30             |
|                     | D6  | 4.2 (4.4 .0-13.6)               | 6.2 (10.7 .0-43)                | 0.98             | Viremia D1           | 0.29             |
|                     | D16 | 3 (5.8 .0-27.4)                 | 3.7 (10 .0-41.9)                | 0.20             | CQ                   | <b>&lt;0.001</b> |
| <b>IL8</b>          | D1  | 42.3 (28.7 .15.9-149.4)         | 24.7 (14.5 .3.9-61.6)           | <b>0.005</b>     | Age                  | 0.55             |
|                     | D3  | 30.5 (20.1 .6.1-91.4)           | 27.1 (14.6 .3.7-63.1)           | 0.99             | Sexe                 | 0.099            |
|                     | D6  | 32.1 (35.9 .6.4-179.1)          | 20.6 (16.4 .1.8-65.5)           | 0.12             | Viremia D1           | <b>0.031</b>     |
|                     | D16 | 18.3 (13.7 .0.8-53.4)           | 11.1 (12.1 .0.3-56.2)           | <b>0.02</b>      | CQ                   | 0.87             |
| <b>IP10</b>         | D1  | 10881 (4267 .3866.4-19407.6)    | 9931.4 (3873.1 .2819.8-15234.6) | 0.56             | Age                  | 0.29             |
|                     | D3  | 7403.6 (3769.1 .626.8-16440.2)  | 9392.9 (4085.1 .3406.7-14078.4) | 0.14             | Sexe                 | 0.40             |
|                     | D6  | 6918.5 (3020.9 .1855.2-14534.5) | 7203.8 (3783.6 .2916.9-13953.8) | 0.98             | Viremia D1           | 0.11             |
|                     | D16 | 1439.2 (2041.7 .150.6-9212)     | 1075.3 (689.9 .311.8-2929.2)    | 0.58             | CQ                   | 0.68             |
| <b>MCP1</b>         | D1  | 2801.4 (1577.4 .579.1-6499.6)   | 4443.7 (2760.7 .1103.3-9613.3)  | <b>0.039</b>     | Age                  | 0.96             |
|                     | D3  | 963.4 (481.5 .219.6-2155)       | 1429.3 (1050.6 .425.4-5192)     | 0.059            | Sexe                 | 0.26             |
|                     | D6  | 898.3 (661.9 .235.8-3624.8)     | 963.3 (581.7 .289.4-2973.9)     | 0.49             | Viremia D1           | 0.98             |
|                     | D16 | 519.4 (203.9 .262.6-1168.3)     | 506.9 (242.5 .243.8-1198.6)     | 0.61             | CQ                   | <b>0.013</b>     |

|             |     |                       |                        |              |            |      |
|-------------|-----|-----------------------|------------------------|--------------|------------|------|
| <b>TNFα</b> | D1  | 23.4 (10.3 .7.1-52.4) | 26.6 (10.2 .10.7-50.8) | 0.17         | Age        | 0.20 |
|             | D3  | 16.6 (5.7 .6.6-30.7)  | 27 (13.7 .10.1-68.1)   | <b>0.003</b> | Sexe       | 0.57 |
|             | D6  | 16.7 (6.1 .8.7-29.4)  | 28 (26.5 .8.3-130.3)   | <b>0.03</b>  | Viremia D1 | 0.76 |
|             | D16 | 11.4 (5.4 .0-24.1)    | 16.2 (7.2 .7.6-39.6)   | <b>0.02</b>  | CQ         | 0.15 |
